# Supplementary material
Source: PubMed Central journal article supplement (PMC5609186)
Supplement: NIHMS906363-supplement-supplemental.pdf [file NIHMS906363-supplement-supplemental.pdf]

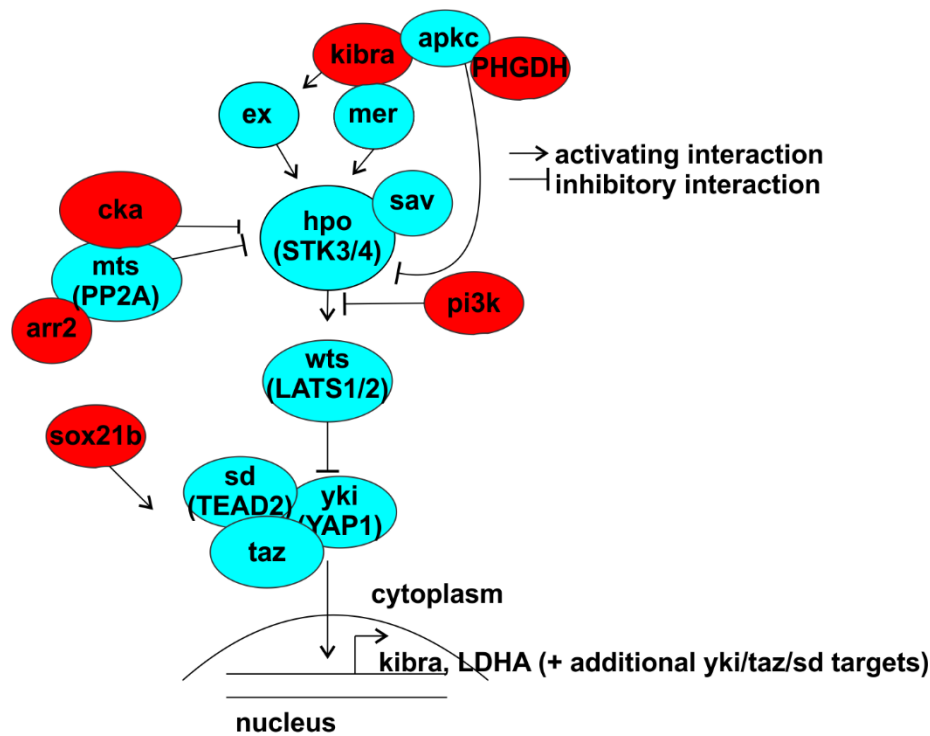

**Figure S1. Top candidate genes identified by RNA-Seq screen (red) converge onto the Hippo signaling pathway (turquoise).** Kibra activates Hippo signaling by interactions with mer and ex (Genevet et al., 2010). Activation of Hippo signaling prevents yki from entering the nucleus and turning on transcriptional targets, including kibra. All other candidate genes instead activate yki mediated transcription by either interacting directly with its transcriptional coactivator sd/TEAD2 (sox21b ortholog SOX12 (Bhattaram et al., 2010)) or by inhibition higher up in the signaling cascade (Fan et al., 2013; Ribeiro et al.).  $\beta$ -arrestin (arr2) and PHGDH have not been shown to directly inhibit Hippo signaling, but they are known interactors of the inhibitors PP2A and aPKC (PKCzeta) (Beaulieu et al., 2005; Ma et al., 2013). LDHA (Imp13) has not been shown to act on Hippo signaling, but instead may be a transcriptional target (Xiang et al., 2015).

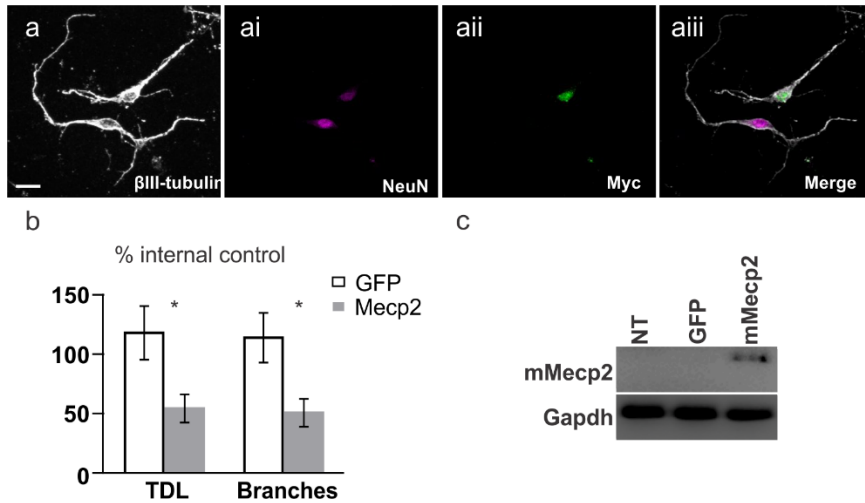

**Figure S2. Overexpression of mMeCP2 using AAV causes the same dendritic phenotype as electroporation method.** a. Representative image of AAV-mMeCP2-myc transduced neuron in at 4DIV in culture shows localized nuclear expression (a ii). b. Quantification of total dendritic length (TDL) and number of branches following AAV transduction ( $*p < 0.05$ , Bonferroni t-test after 2-way ANOVA,  $F_{1,36} = 13.09$ ,  $p < 0.001$ ,  $n = 10$  cells per group). c. Representative Western blot showing mMeCP2 overexpression following in primary cortical neurons following AAV-mMeCP2-myc transduction. mMeCP2 is expressed at low levels during early postnatal cortical development (Kishi and Macklis, 2004); thus, mMeCP2 was only detected with AAV induced overexpression. Scale bar represents 20 $\mu$ m.

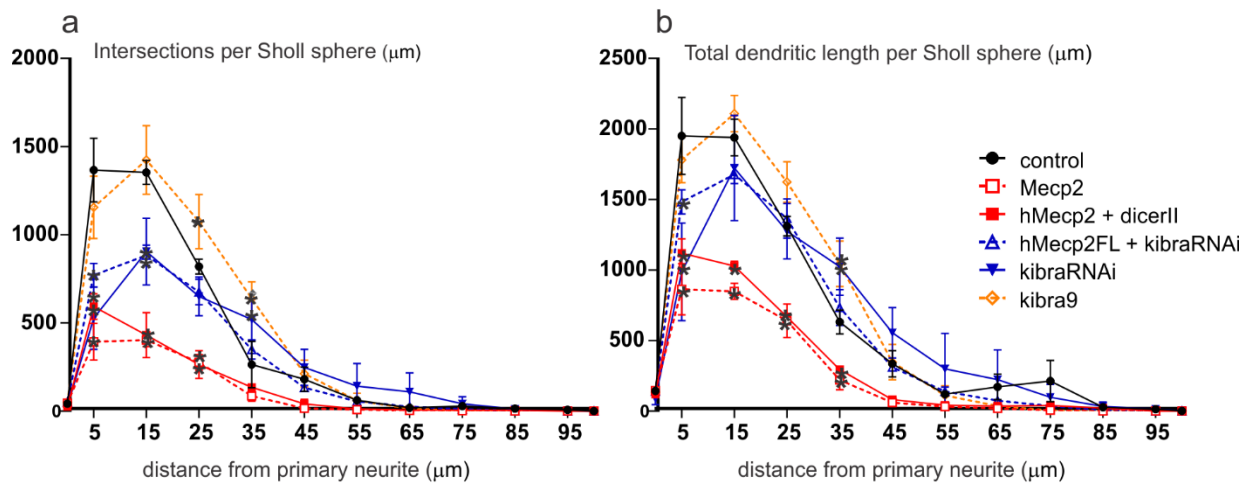

**Figure S3. Sholl analysis of *Drosophila* MN5 dendritic morphology with targeted genetic manipulations.** a. Quantification of the number of intersections or total dendritic length per 10µm Sholl sphere (\*  $p < 0.05$ , Bonferroni t-test after two-way ANOVA,  $F_{5,192} = 38.65$ ,  $p < 0.0001$ ,  $n = 3-7$  cells per group). b. Quantification of total dendritic length per Sholl sphere (\*  $p < 0.05$ , Bonferroni t-test after two-way ANOVA,  $F_{5,192} = 31.35$ ,  $p < 0.001$ ,  $n = 3-7$  cells per group). The entire primary neurite of MN5 was defined as the tree origin for Sholl analysis.

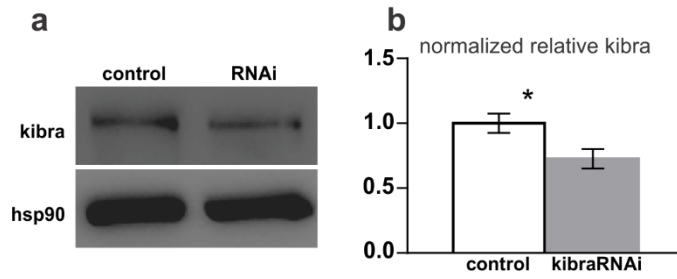

**Figure S4. *kibra*RNAi moderately decreases dkibra levels in *Drosophila* brain.** a. Representative Western blot for dkibra following pan neuronal *kibra* knockdown. b. Quantification of Western blot analysis (\*  $p < 0.05$  unpaired  $t$ -test,  $t_{23} = 2.59$ ,  $n = 12-13$  per group).

**Table S1.****a. List of genes differentially expressed with pan neuronal human MECP2 expression in the adult fly brain**

| <b>Flybase ID</b>                               | <b>Human orthologs</b>                                | <b>log2- Fold Change</b> | <b>FDR corrected p</b> | <b>Mouse array matches</b>           |
|-------------------------------------------------|-------------------------------------------------------|--------------------------|------------------------|--------------------------------------|
| <b>Genes with identified human orthologs</b>    |                                                       |                          |                        |                                      |
| arr2                                            | ARRB2, ARRB1, SAG, ARR3<br>PNLIP, PNLIPRP1, PNLIPRP3, | 1.610                    | 0.001                  | ARRB2 in hyp., SAG in hipp.<br>(9wk) |
| CG5966                                          | PNLIPRP2                                              | 3.377                    | 0.004                  | PNLIPRP2 in hipp. (4wk)              |
| pepck                                           | PCK2, PCK1                                            | 1.676                    | 0.004                  | PCK2 in hyp.                         |
| rh2                                             | COMMD2, OPN4                                          | 1.377                    | 0.007                  | OPN4 in hipp. (4wk)                  |
| pi3k92e                                         | PIK3CD, PIK3CB, PIK3CA, PIK3CG                        | 1.385                    | 0.008                  | PIK3CG in hyp. & cb.                 |
| CG11486                                         | PAN3                                                  | 1.580                    | 0.008                  | PAN3 in hipp. (4 & 9 wk)             |
| cka                                             | STRN4, STRN, STRN3                                    | 2.022                    | 0.013                  | STRN4 in hyp.                        |
| sox21b                                          | SOX14, SOX21, SOX12                                   | 1.464                    | 0.024                  | SOX 12 in cb.                        |
| dysc                                            | DFNB31, PDZD7                                         | 1.242                    | 0.040                  | PDZD7 in hyp. & hipp.                |
| ppt2                                            | PPT2, EGFL8                                           | 1.716                    | 0.042                  | PPT2 in hyp.                         |
| arpc1                                           | ARPC1A, ARPC1B                                        | 2.546                    | 0.042                  | ARPC1A in hyp.                       |
| kibra                                           | WWC1 (KIBRA), WWC2                                    | 1.217                    | 0.049                  | WWC1 in cb.                          |
| CG3328                                          | MYRF, MYRFL                                           | 1.743                    | 0.001                  |                                      |
| CG6287                                          | PHGDH                                                 | 1.722                    | 0.001                  |                                      |
| hr4                                             | NR6A1                                                 | 2.706                    | 0.003                  |                                      |
| impL3                                           | LDHA, LDHB, LDHAL6A                                   | 2.988                    | 0.025                  |                                      |
| CG7332                                          | FAM188A                                               | 1.278                    | 0.027                  |                                      |
| sec31                                           | SEC31A, SEC31B                                        | 1.428                    | 0.049                  |                                      |
| CG18095                                         | LRRTM3                                                | 6.330                    | 0.050                  |                                      |
| CG3625                                          | AIG1, ADTRP                                           | -1.490                   | 0.011                  |                                      |
| <b>Genes without identified human orthologs</b> |                                                       |                          |                        |                                      |
| irc                                             |                                                       | 1.971                    | 0.000                  |                                      |
| CG13722                                         |                                                       | 3.990                    | 0.002                  |                                      |
| CG11697                                         |                                                       | 2.115                    | 0.005                  |                                      |
| CG14982                                         |                                                       | 1.570                    | 0.006                  |                                      |
| mtk                                             |                                                       | 5.463                    | 0.015                  |                                      |

|         |  |        |       |
|---------|--|--------|-------|
| CG32240 |  | 7.373  | 0.024 |
| drs     |  | 4.017  | 0.033 |
| CG15784 |  | 3.527  | 0.042 |
| CG10332 |  | 5.878  | 0.049 |
| totA    |  | -3.743 | 0.000 |
| totC    |  | -7.476 | 0.040 |
| fok     |  | -1.250 | 0.040 |

**b. List of genes differentially expressed with hR106W expression, but not hMECP2FL**

| <b>Flybase ID</b> | <b>Human orthologs</b> | <b>log2- Fold<br/>Change</b> | <b>FDR<br/>corrected p</b> | <b>Mouse array matches</b> |
|-------------------|------------------------|------------------------------|----------------------------|----------------------------|
| Su(Ste):CR42418   |                        | -2.921                       | 0.000                      |                            |
| bt                | TTN                    | -1.695                       | 0.016                      |                            |

**c. List of genes differentially expressed with both hMECP2 and hR106W expression**

| <b>Flybase ID</b> | <b>Human orthologs</b> | <b>log2- Fold<br/>Change</b> | <b>FDR<br/>corrected p</b> | <b>Mouse array matches</b> |
|-------------------|------------------------|------------------------------|----------------------------|----------------------------|
| socs16D           | SOCS7                  | 1.705                        | 0.000                      | SOCS7 in hyp.              |
| CG12241           | SGSM3                  | 1.842                        | 0.001                      |                            |
| CG7582            | TMEM86A, TMEM86B       | 1.543                        | 0.012                      |                            |
| CR40712           |                        | -2.624                       | 0.000                      |                            |

## **SUPPLEMENTARY MATERIAL REFERENCES**

- Beaulieu, J. M., et al., 2005. An Akt/beta-arrestin 2/PP2A signaling complex mediates dopaminergic neurotransmission and behavior. *Cell*. 122, 261-73.
- Bhattaram, P., et al., 2010. Organogenesis relies on SoxC transcription factors for the survival of neural and mesenchymal progenitors. *Nature Communications*. 1, 1-12.
- Fan, R., et al., 2013. Regulation of Hippo pathway by mitogenic growth factors via phosphoinositide 3-kinase and phosphoinositide-dependent kinase-1. *Proceedings of the National Academy of Sciences of the United States of America*. 110, 2569-2574.
- Genevet, A., et al., 2010. Kibra Is a Regulator of the Salvador/Warts/Hippo Signaling Network. *Developmental Cell*. 18, 300-308.
- Kishi, N., Macklis, J. D., 2004. MECP2 is progressively expressed in post-migratory neurons and is involved in neuronal maturation rather than cell fate decisions. *Molecular and Cellular Neuroscience*. 27, 306-321.
- Ma, L., et al., 2013. Control of Nutrient Stress-Induced Metabolic Reprogramming by PKC $\zeta$  in Tumorigenesis. *Cell*. 152, 599-611.
- Ribeiro, P. S., et al., Combined Functional Genomic and Proteomic Approaches Identify a PP2A Complex as a Negative Regulator of Hippo Signaling. *Molecular Cell*. 39, 521-534.
- Xiang, L., et al., 2015. HIF-1 $\alpha$  and TAZ serve as reciprocal co-activators in human breast cancer cells. *Oncotarget*. 6, 11768-11778.
